# Supplementary material for: Thermally resistant thermadapt shape memory crosslinked polymers based on silyl ether dynamic covalent linkages for self-folding and self-deployable smart 3D structures
Source: Royal Society of Chemistry journal article supplement (doi:10.1039/c9ta01147a), 2019-01-01
Supplement: c9ta01147a1.pdf [file c9ta01147a1.pdf]

## **Supporting Information**

### **Thermally resistant thermadappt shape memory crosslinked polymers based on silyl ether dynamic covalent linkages for self-folding and self-deployable smart 3D structures**

Zhenjie Ding, Li Yuan, Guozheng Liang\* and Aijuan Gu\*

State and Local Joint Engineering Laboratory for Novel Functional Polymeric Materials  
Jiangsu Key Laboratory of Advanced Functional Polymer Design and Application  
Department of Materials Science and Engineering  
College of Chemistry, Chemical Engineering and Materials Science  
Soochow University, Suzhou 215123, P. R. China

---

\* Corresponding author: Tel: +86 512 65880967; Fax: +86 512 65880089.  
E-mail address: lgzheng@suda.edu.cn (GZ Liang); ajgu@suda.edu.cn (AJ Gu).

Table S1 Gel fraction of EPSis in DMF at 150 °C for 24 h

| Sample   | Gel fraction (%) |
|----------|------------------|
| EPSi-0.3 | 97.7±0.08        |
| EPSi-0.5 | 98.4±0.09        |
| EPSi-0.7 | 99.2±0.10        |
| EPSi-0.9 | 99.4±0.06        |

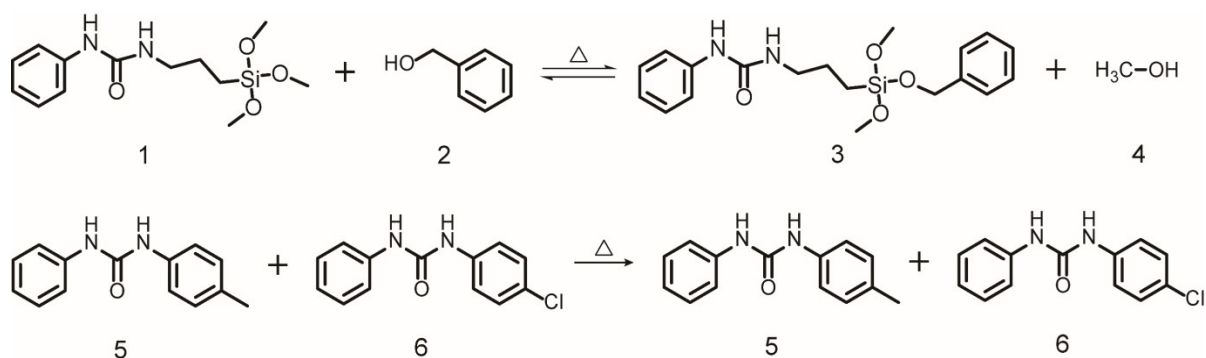

Fig. S1 Structures of model compounds used in the study.

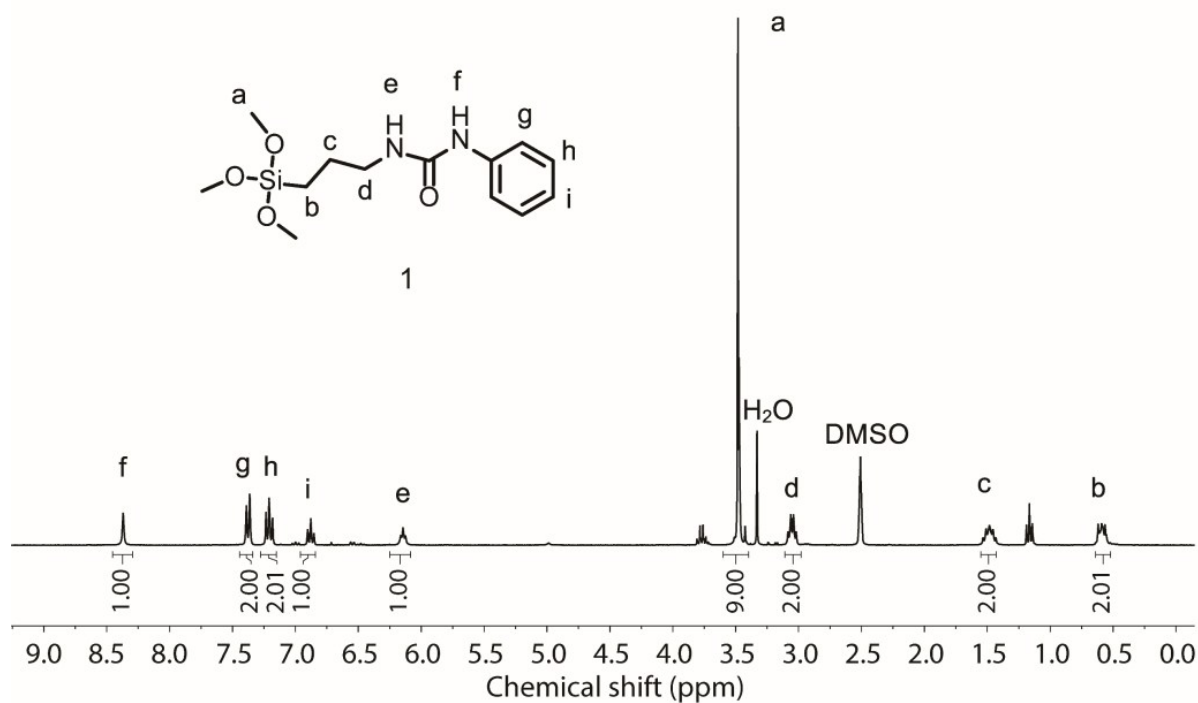

Fig. S2 <sup>1</sup>H NMR spectrum of model compound 1.

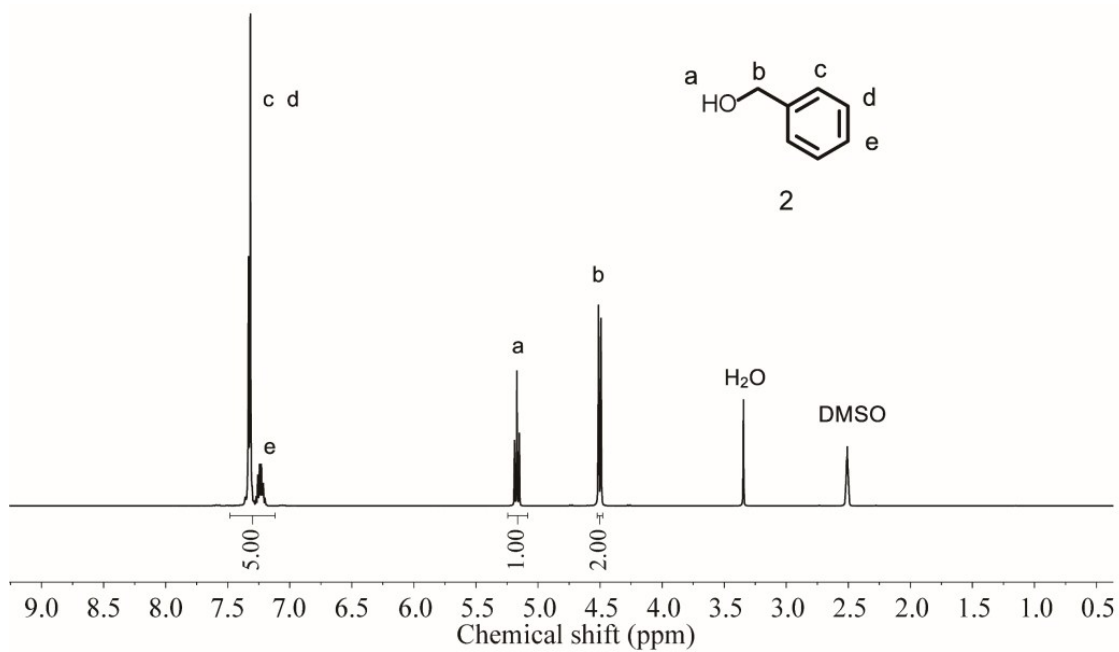

Fig. S3  $^1\text{H}$  NMR spectrum of model compound 2.

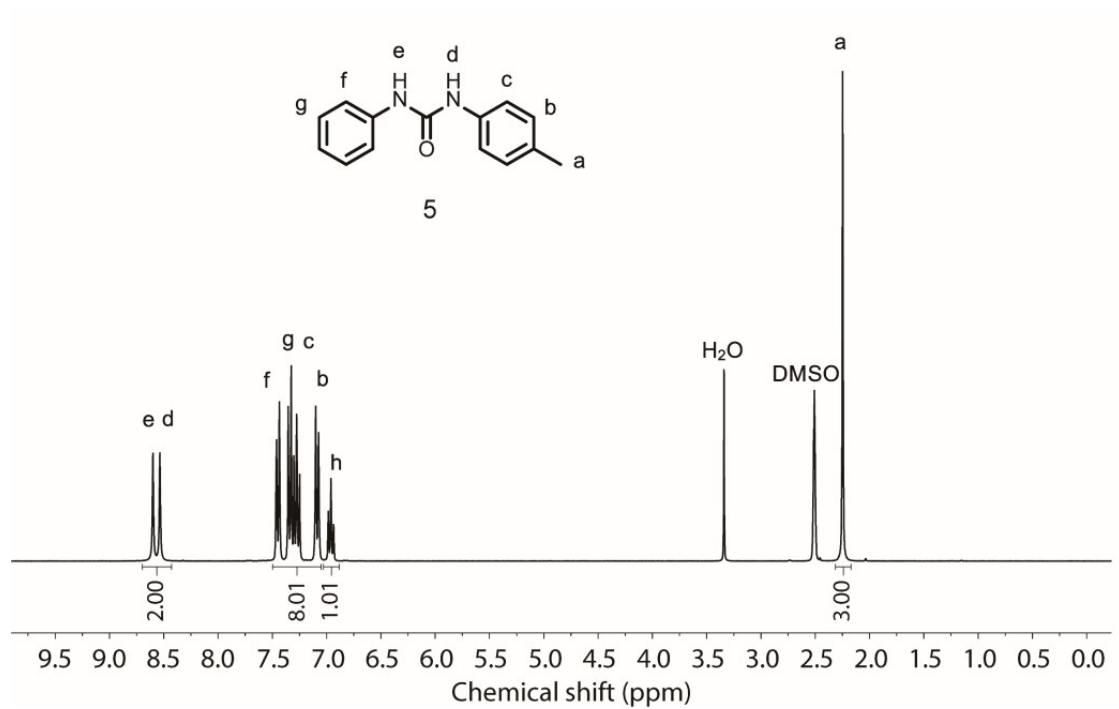

Fig. S4  $^1\text{H}$  NMR spectrum of model compound 5.

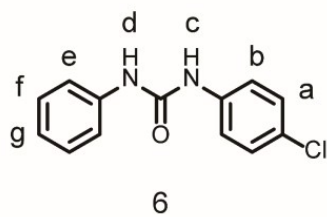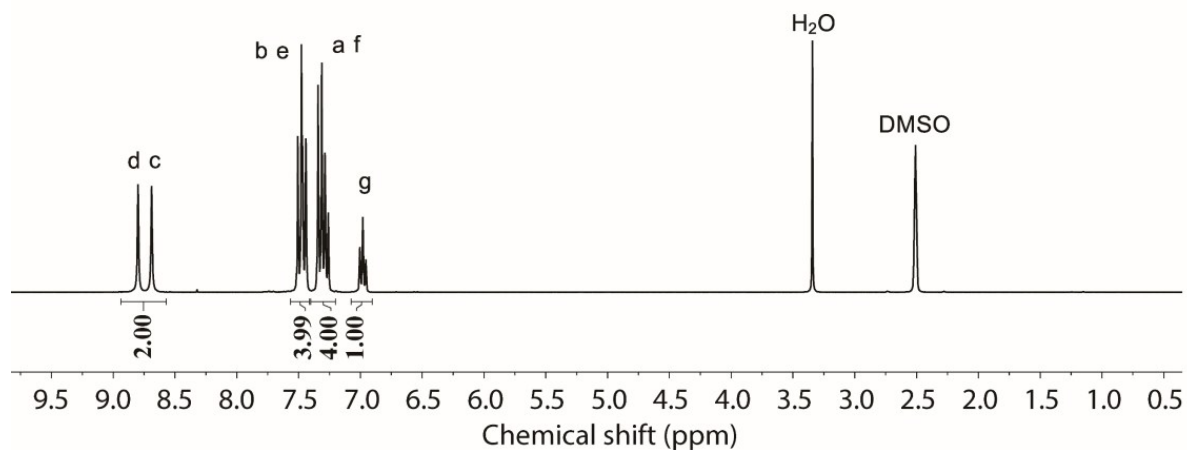

Fig. S5  $^1\text{H}$  NMR spectrum of model compound 6.

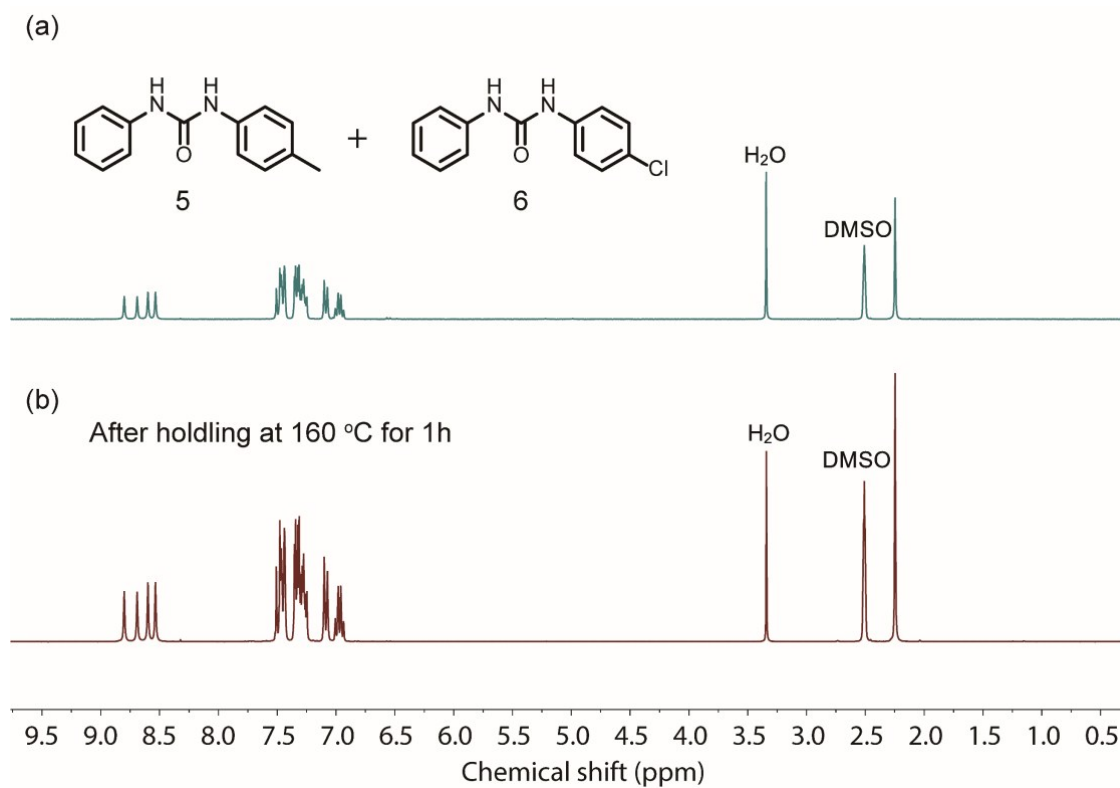

Fig. S6  $^1\text{H}$  NMR spectra of model compounds mixture (a) and after holding at 160 °C for 1 h (b).

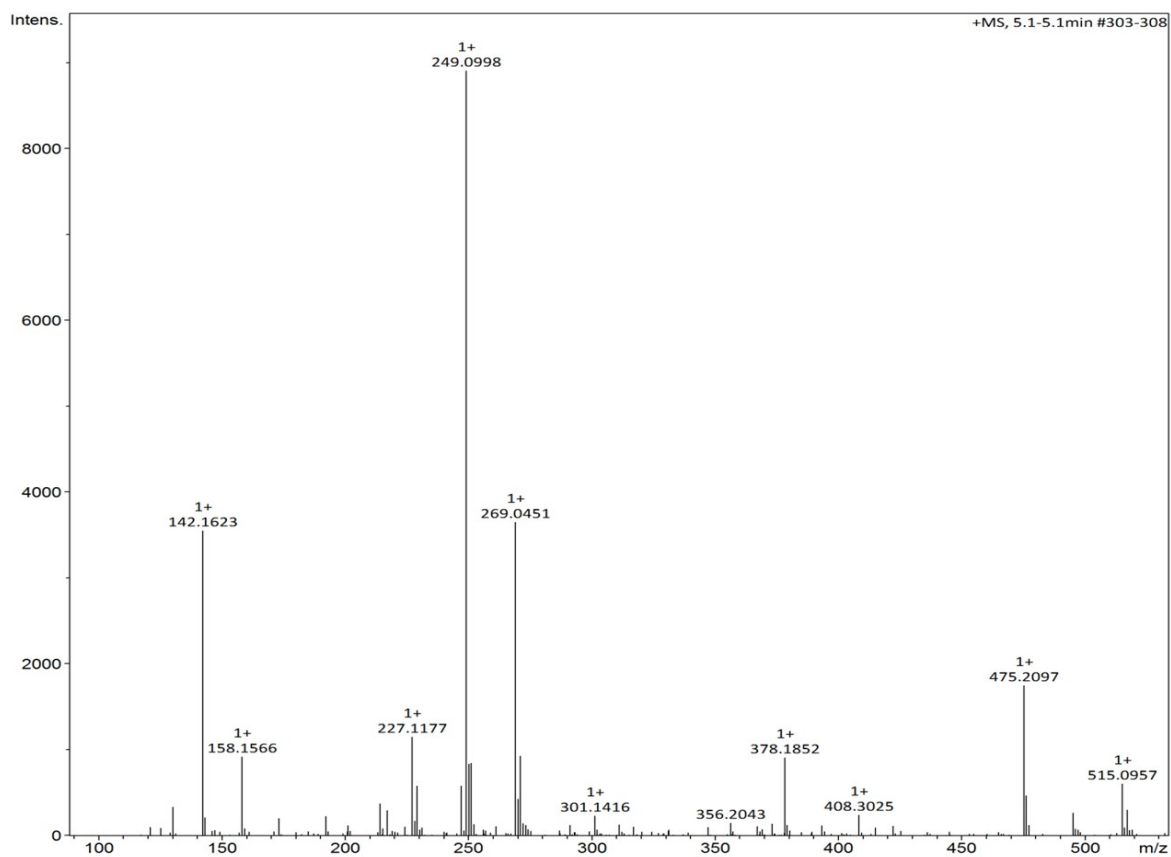

Fig. S7 Mass spectra of model compounds mixture of 5 and 6.

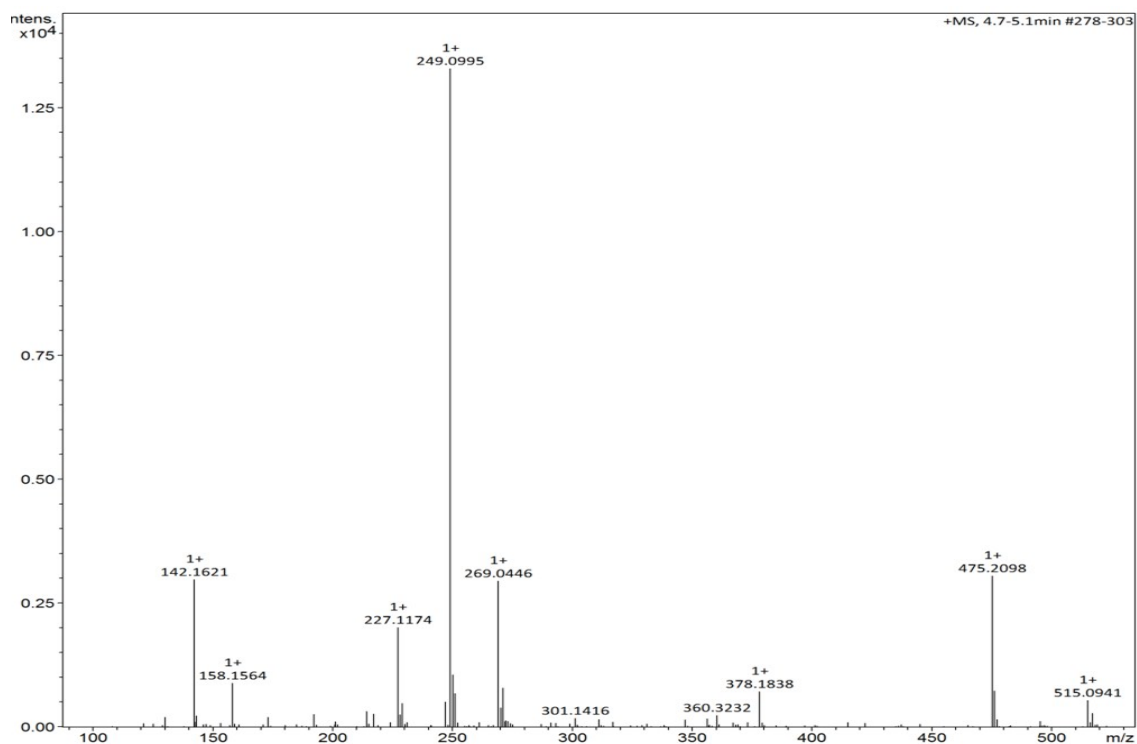

Fig. S8 Mass spectra of model compounds mixture of 5 and 6 after holding at 160 °C for 1

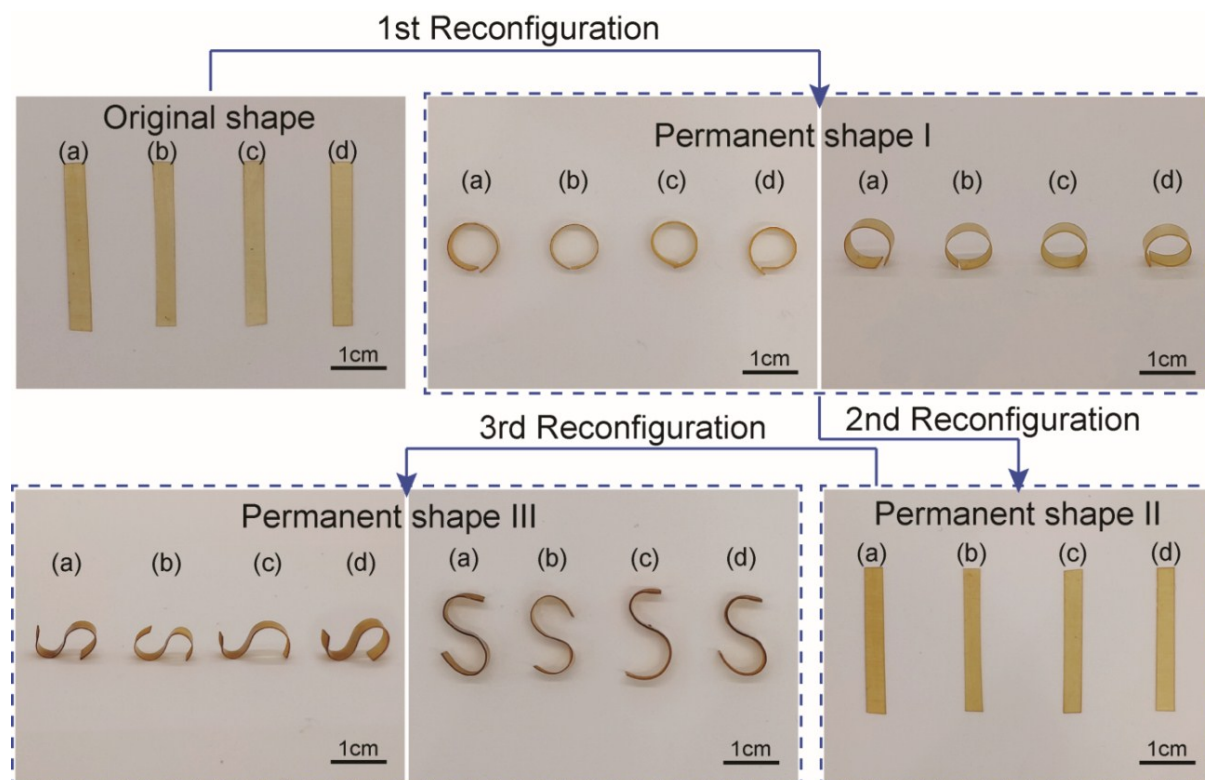

Fig. S9 Multiple reconfiguration of EPSi-0.3 (a), EPSi-0.5 (b), EPSi-0.7 (c) and EPSi-0.9 (d).

Table S2 Integrated performances of thermadappt shape memory polymers (TASMPs) in literatures and this work.

| TASMP<br>(sample name)                                     | Dynamic bonds              | $T_g/T_m$<br>(°C) | $T_{di}$<br>(°C) | Tensile properties |                   |            | $R_f$<br>(%) | $R_r$<br>(%) | $R_{ret}$<br>(%) | Ref       |
|------------------------------------------------------------|----------------------------|-------------------|------------------|--------------------|-------------------|------------|--------------|--------------|------------------|-----------|
|                                                            |                            |                   |                  | $\sigma$ (MPa)     | $\varepsilon$ (%) | $E$ (MPa)  |              |              |                  |           |
| EPSi-0.5                                                   | Hydroxyl silyl ether bonds | 129.3             | 314              | 82.4±1.3           | 8.0±0.3           | 1864±52    | 95.6         | 99.2         | 83.3             | This work |
| E51/SA/1%graphene<br>(EP-1wt%)                             | Transesterification        | 48.3              | 348              | 22.9±1.7           | 44                | 1232±23.5  | 98           | 99           | ~100             | [S1]      |
| E51/SA<br>(EP)                                             |                            | 42.9              | 345              | 12.0±0.8           | ~6                | 565.9±10.1 | --           | --           | --               |           |
| EP/MHHPA/PGE<br>(epoxy 3)                                  | Transesterification        | 75                | -- <sup>a</sup>  | --                 | --                | --         | 98           | 99           | --               | [S2]      |
| Eu-EP/SA (1:0.5)<br>(R=1:0.5)                              | Transesterification        | 53                | 310              | 25                 | 8.5               | 1400       | 91.8         | ~100         | --               | [S3]      |
| Poly(caprolactone)<br>networks                             | Transesterification        | ~55               | --               | --                 | --                | --         | >98          | >98          | ~100             | [S4]      |
| Polyanhydride networks<br>(PAH/PCL PU)                     | Transesterification        | ~30               | --               | 4-5                | 150-200           | --         | 86-87        | 78-93        | ~98              | [S5]      |
| Epoxidized natural<br>rubber/carbon nanodot<br>(ENR/CD-35) | Transesterification        | ~40               | --               | 17.9               | 452               | 1.5        | >98          | >98          | ~40              | [S6]      |
| Thermoset polyurethane                                     | Transcarbamylation         | ~41               | --               | --                 | --                | --         | 98           | 99           | ~98              | [S7]      |

|                                         |                           |            |       |                 |                   |                |       |       |      |       |
|-----------------------------------------|---------------------------|------------|-------|-----------------|-------------------|----------------|-------|-------|------|-------|
| Thermoset polyurethane (PU-4)           | Transcarbamylation        | ~80        | --    | --              | --                | --             | 99.7  | 97.9  | ~98  | [S8]  |
| Thermoset polyurethane (PUU3)           | Transcarbamylation        | ~40        | --    | ~1.1            | ~520              | --             | 95    | 95    | ~98  | [S9]  |
| Thermoset polyurethane (P1)             | Transcarbamylation        | ~50        | --    | $8.16 \pm 0.57$ | $13.04 \pm 2.9_0$ | --             | >94   | >94   | >98  | [S10] |
| BGPP/FA/BM (DA0.2)                      | Diels-Alder               | 35         | --    | --              | --                | --             | 88.8  | 87.5  | 95.6 | [S11] |
| SBS-Fu20/CNTs                           | Diels-Alder               | -73,<br>75 | --    | 15.3-18.5       | 600~890           | --             | Photo | Photo | --   | [S12] |
| MDS-EPO                                 | Disulfide                 | 41.4       | 268.8 | $10.9 \pm 2.2$  | $0.60 \pm 0.17$   | $1990 \pm 130$ | --    | 100   | --   | [S13] |
| Polysulfide networks (poly(S-PTMP)-51)  | Disulfide                 | 36.4       | 252.9 | ~5              | ~15               | --             | Photo | Photo | --   | [S14] |
| Thermoset polyurethane (PU10)           | Diselenide                | 57         |       | 17              | 100               | --             | 91    | 97    | ~90  | [S15] |
| PCL networks (PCL-6Indole)              | Reversible TAD Chemistry  | 50         | --    | --              | --                | --             | 99    | 96-99 | ~80  | [S16] |
| Metallosupramolecular networks (CP2-Ni) | Metal-ligand interactions | ~50        | --    | --              | --                | --             | 99    | 95    | ~98  | [S17] |

a: Data not given in the reference.



## References

- [S1] Z. Yang, Q. Wang and T. Wang, *ACS Appl. Mater. Interfaces*, 2016, **8**, 21691-21699.
- [S2] J. Zhu, G. Fang, Z. Cao, X. Meng and H. Ren, *Ind. Eng. Chem. Res.*, 2018, **57**, 5276-5281.
- [S3] T. Liu, C. Hao, L. Wang, Y. Li, W. Liu, J. Xin and J. Zhang, *Macromolecules*, 2017, **50**, 8588-8597.
- [S4] Q. Zhao, W. Zou, Y. Luo and T. Xie, *Sci. Adv.*, 2016, **2**, e1501297.
- [S5] M. I. Lawton, K. R. Tillman, H. S. Mohammed, W. Kuang, D. A. Shipp and P. T. Mather, *ACS Macro Lett.*, 2016, **5**, 203-207.
- [S6] Z. Tang, Y. Liu, B. Guo and L. Zhang, *Macromolecules*, 2017, **50**, 7584-7592.
- [S7] N. Zheng, Z. Fang, W. Zou, Q. Zhao and T. Xie, *Angew. Chem. Int. Ed.*, 2016, **55**, 11421-11425.
- [S8] N. Zheng, J. Hou, Y. Xu, Z. Fang, W. Zou, Q. Zhao and T. Xie, *ACS Macro Lett.*, 2017, **6**, 326-330.
- [S9] Z. Fang, N. Zheng, Q. Zhao and T. Xie, *ACS Appl. Mater. Interfaces*, 2017, **9**, 22077-22082.
- [S10] Y. Wang, Y. Pan, Z. Zheng and X. Ding, *Macromol. Rapid Commun.*, 2018, **39**, 1800128.
- [S11] G. Zhang, Q. Zhao, L. Yang, W. Zou, X. Xi and T. Xie, *ACS Macro Lett.*, 2016, **5**, 805-808.
- [S12] J. Bai and Z. Shi, *ACS Appl. Mater. Interfaces*, 2017, **9**, 27213-27222.
- [S13] Z. Ma, Y. Wang, J. Zhu, J. Yu and Z. Hu, *J. Polym. Sci., Part A: Polym. Chem.*, 2017, **55**, 1790-1799.
- [S14] S. Zhang, L. Pan, L. Xia, Y. Sun and X. Liu, *React. Funct. Polym.*, 2017, **121**, 8-14.
- [S15] S. Ji, F. Fan, C. Sun, Y. Yu and H. Xu, *ACS Appl. Mater. Interfaces*, 2017, **9**, 33169-33175.
- [S16] T. Defize, R. Riva, J.-M. Thomassin, M. Alexandre, N. V. Herck, F. D. Prez and C. Jérôme, *Macromol. Rapid Commun.*, 2017, **38**, 1600517.
- [S17] L. Yang, G. Zhang, N. Zheng, Q. Zhao and T. Xie, *Angew. Chem. Int. Ed.*, 2017, **56**, 12599-12602.
